# Supplementary material for: Perceived discrimination among older adults living in urban and rural areas in Brazil: a national study (ELSI-Brazil)
Source: Springer Nature journal article supplement (doi:10.1186/s12877-019-1076-4), 2019-03-04
Supplement: MOESM1 [file 16524446]

**ADDITIONAL FILE 1**

Principal component analysis on health status.

| <b>Component</b> | <b>Eigenvalue</b> | <b>Difference</b> | <b>Proportion</b> | <b>Cumulative</b> |
|------------------|-------------------|-------------------|-------------------|-------------------|
| Comp1            | 2,5503            | 1,2515            | 0,1962            | 0,1962            |
| Comp2            | 1,2987            | 0,0109            | 0,0999            | 0,2961            |
| Comp3            | 1,2879            | 0,1981            | 0,0991            | 0,3951            |
| Comp4            | 1,0898            | 0,1140            | 0,0838            | 0,4790            |
| Comp5            | 0,9757            | 0,0838            | 0,0751            | 0,5540            |
| Comp6            | 0,8919            | 0,0410            | 0,0686            | 0,6226            |
| Comp7            | 0,8510            | 0,0191            | 0,0655            | 0,6881            |
| Comp8            | 0,8318            | 0,1032            | 0,0640            | 0,7521            |
| Comp9            | 0,7286            | 0,0479            | 0,0560            | 0,8081            |
| Comp10           | 0,6807            | 0,0397            | 0,0524            | 0,8605            |
| Comp11           | 0,6410            | 0,0120            | 0,0493            | 0,9098            |
| Comp12           | 0,6290            | 0,0854            | 0,0484            | 0,9582            |
| Comp13           | 0,5436            | .                 | 0,0418            | 1,0000            |

| <b>Variable</b>   | <b>Comp1</b> | <b>Comp2</b> | <b>Comp3</b> | <b>Comp4</b> | <b>Comp5</b> | <b>Comp6</b> | <b>Comp7</b> | <b>Comp8</b> | <b>Comp9</b> | <b>Comp10</b> | <b>Comp11</b> | <b>Comp12</b> | <b>Comp13</b> |
|-------------------|--------------|--------------|--------------|--------------|--------------|--------------|--------------|--------------|--------------|---------------|---------------|---------------|---------------|
| DCV               | 0,2171       | 0,0698       | 0,3559       | 0,2304       | 0,3216       | 0,2592       | -0,4565      | -0,5828      | -0,0658      | 0,0878        | -0,0049       | 0,1872        | 0,0496        |
| Hypertension      | 0,1838       | -0,0489      | 0,4445       | 0,2741       | 0,0521       | 0,1655       | -0,2784      | 0,7507       | -0,0381      | -0,0442       | 0,1019        | -0,0448       | 0,0644        |
| Diabetes          | 0,1022       | -0,0348      | 0,3924       | 0,2520       | -0,6336      | 0,2911       | 0,4685       | -0,2110      | 0,0759       | -0,0459       | 0,0677        | 0,0378        | 0,0821        |
| Stroke            | 0,1249       | -0,0303      | 0,4467       | 0,0761       | 0,4078       | -0,6309      | 0,4333       | -0,0562      | 0,1327       | -0,0263       | 0,0398        | 0,0251        | 0,0485        |
| Asthma            | 0,1490       | 0,6822       | -0,0601      | -0,0188      | -0,1016      | -0,0716      | 0,0468       | 0,1736       | 0,1077       | 0,1295        | -0,2287       | 0,6159        | -0,0247       |
| COPD              | 0,1770       | 0,6773       | -0,0142      | -0,0030      | -0,0104      | -0,0275      | -0,0084      | -0,0796      | -0,0833      | -0,1098       | 0,2920        | -0,6274       | 0,0675        |
| Arthritis         | 0,3272       | -0,0735      | -0,3308      | 0,3291       | 0,0698       | -0,0399      | 0,0924       | -0,0208      | -0,3008      | -0,7178       | 0,0587        | 0,2097        | -0,0368       |
| Osteoporosis      | 0,3040       | -0,0841      | -0,2946      | 0,4177       | 0,0828       | -0,0023      | 0,2364       | 0,0493       | -0,3871      | 0,6352        | -0,0849       | -0,1133       | -0,0274       |
| Back pain         | 0,3453       | -0,1152      | -0,2887      | 0,1967       | 0,0101       | 0,0132       | -0,0763      | -0,0083      | 0,7761       | 0,0889        | 0,3126        | -0,0122       | -0,1766       |
| Depression        | 0,3177       | -0,0168      | -0,0136      | -0,2974      | 0,3575       | 0,4868       | 0,3275       | 0,0704       | 0,1857       | -0,1127       | -0,4782       | -0,1777       | 0,1604        |
| Self-rated health | 0,3994       | -0,0841      | 0,1683       | -0,1926      | -0,2909      | -0,2411      | -0,2071      | -0,0474      | -0,0757      | -0,0382       | -0,3878       | -0,1876       | -0,6223       |
| Physical health   | 0,3968       | -0,1594      | -0,0766      | -0,2148      | -0,2959      | -0,3077      | -0,2525      | -0,0365      | -0,0011      | 0,0483        | -0,0804       | 0,0002        | 0,7135        |
| Mental health     | 0,3207       | -0,0897      | 0,0671       | -0,5559      | 0,0621       | 0,1586       | 0,1430       | 0,0345       | -0,2636      | 0,1251        | 0,5932        | 0,2532        | -0,1541       |

DCV: cardiovascular disease (heart attack, angina pectoris, heart failure); COPD: chronic obstructive pulmonary disease.

| <b>Variable</b>   | <b>Kaiser-Meyer-Olkin Test</b> |
|-------------------|--------------------------------|
| DCV               | 0,7640                         |
| Hypertension      | 0,7362                         |
| Diabetes          | 0,6750                         |
| Stroke            | 0,7152                         |
| Asthma            | 0,5623                         |
| COPD              | 0,5820                         |
| Arthritis         | 0,7677                         |
| Osteoporosis      | 0,7626                         |
| Back pain         | 0,7909                         |
| Depression        | 0,7669                         |
| Self-rated health | 0,7504                         |
| Physical health   | 0,7388                         |
| Mental health     | 0,7456                         |
| <b>Overall</b>    | <b>0,7310</b>                  |

DCV: cardiovascular disease (heart attack, angina pectoris, heart failure); COPD: chronic obstructive pulmonary disease.
